# Supplementary material
Source: PubMed Central journal article supplement (PMC3535621)
Supplement: 1218581109_pnas.201218581SI.pdf [file 1218581109_pnas.201218581SI.pdf]

# Supporting Information

Song et al. 10.1073/pnas.1218581109

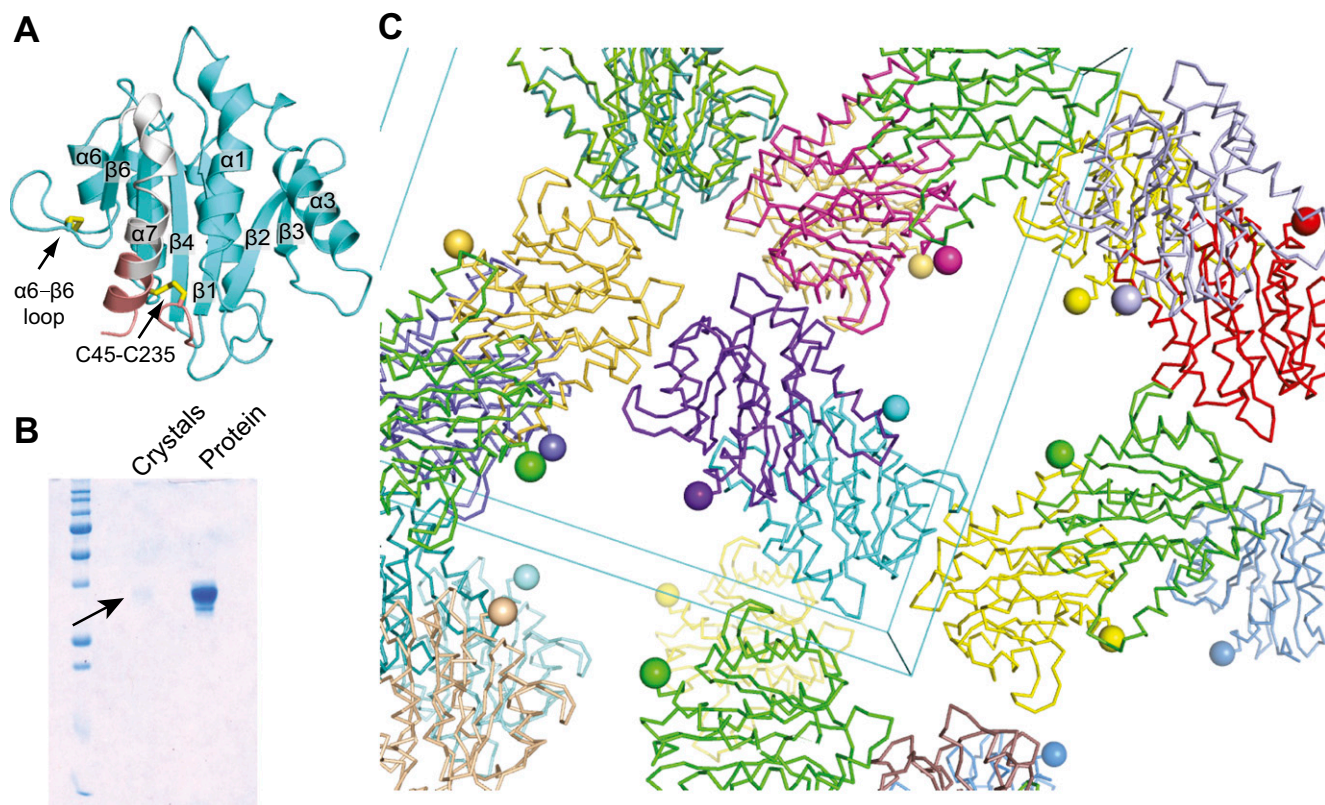

**Fig. S1.** TSR domain is present in pfTRAP (26-299) crystals, but missing in electron density. (A) The structure of pfTRAP (26-299) VWA domain in the same orientation as in Fig. 1 B and C. (B) SDS/PAGE of dissolved crystals and the TRAP protein that was subjected to crystallization. (C) Packing of pfTRAP (26-299) VWA domain in crystal lattice. The chains are shown as ribbons and the C $\alpha$  of terminal residues K240 are shown as spheres.



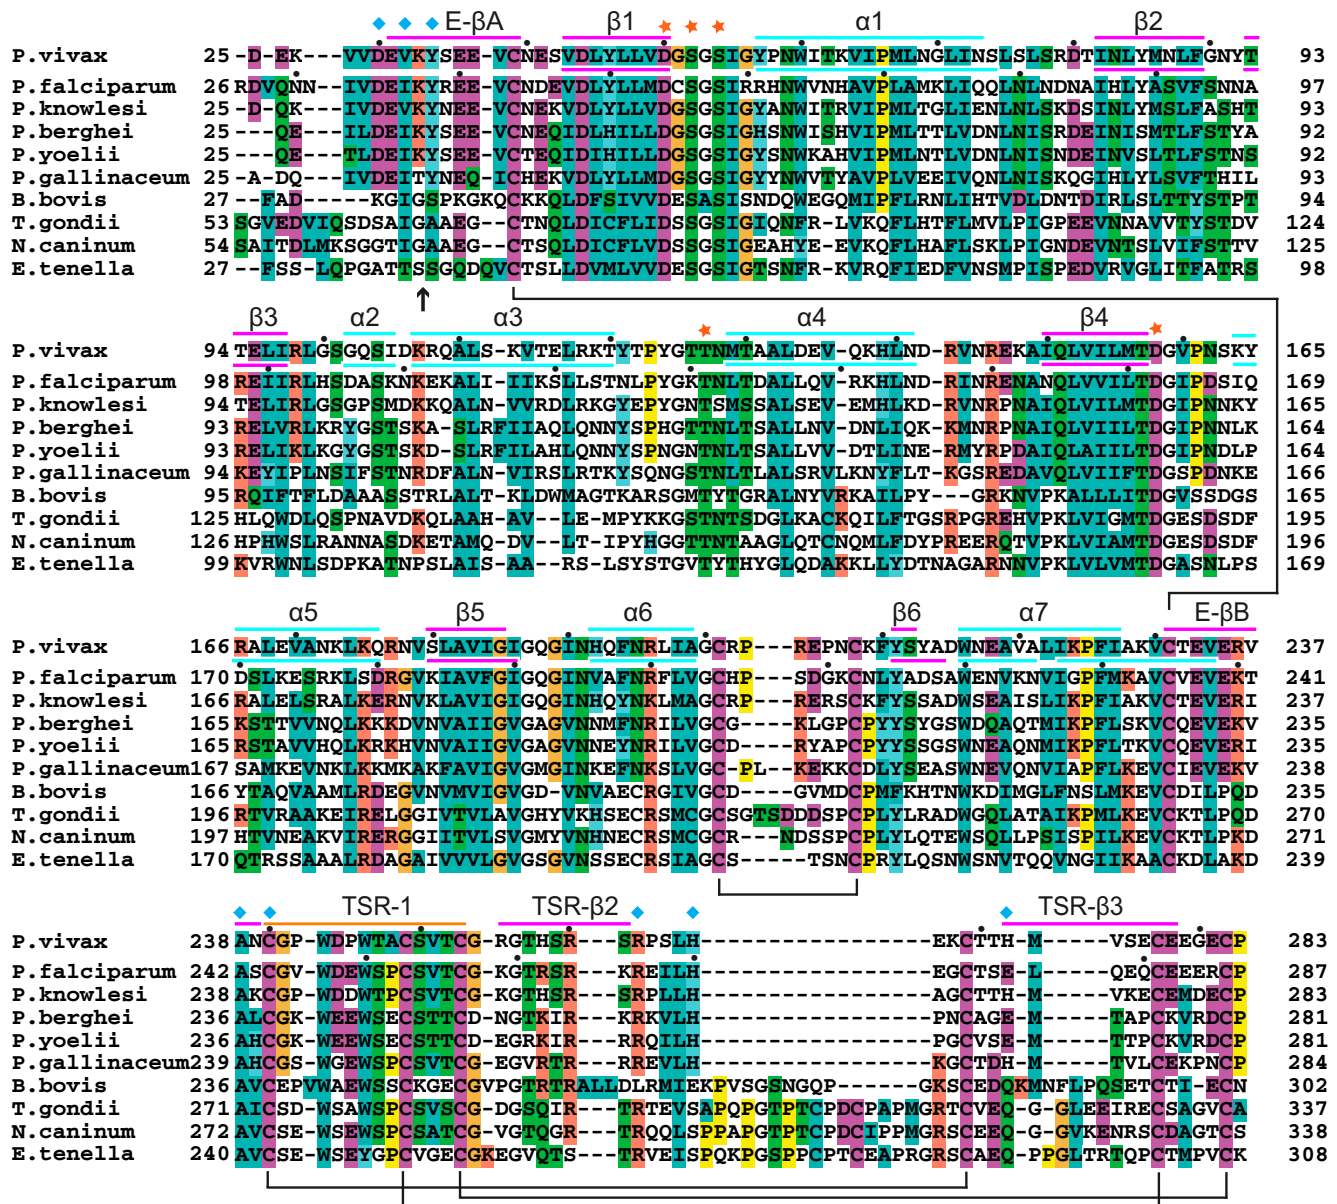

Fig. S3. Sequence alignment of the N-terminal TRAP segment containing the VWA and TSR domains with orthologs in other apicomplexan species. Sequences have GenBank accession numbers AAC97484 (*P. vivax*), AAA29775 (*P. falciparum*), AAG24613 (*Plasmodium knowlesi*), AAB63302 (*Plasmodium berghei*), AAA29768 (*Plasmodium yoelii*), AAC47461 (*Plasmodium gallinaceum*), ACM44016 (*Babesia bovis*), AAB63303 (*Toxoplasma gondii*), AAF01565 (*Neospora caninum*), and AAD03350 (*Eimeria tenella*). Secondary structures are marked above the sequences of *P. vivax* and *P. falciparum* TRAP constructs. MIDAS residues are marked with asterisks. Disulfide-bonded residues are linked by black lines for *P. vivax* and *P. falciparum*. Conserved residues within the interface between the extensible  $\beta$  ribbon and TSR domain are marked with blue diamonds. Black dots mark decadal residues. In MIC2, E- $\beta$ A differs. The long loop between TSR- $\beta$ 2 and TSR- $\beta$ 3 in MIC2 with its additional two cysteines is predicted to extend the interaction interface between the TSR domain and extensible  $\beta$  ribbon and compensate for the different character of extensible  $\beta$  ribbon E- $\beta$ A in MIC2.

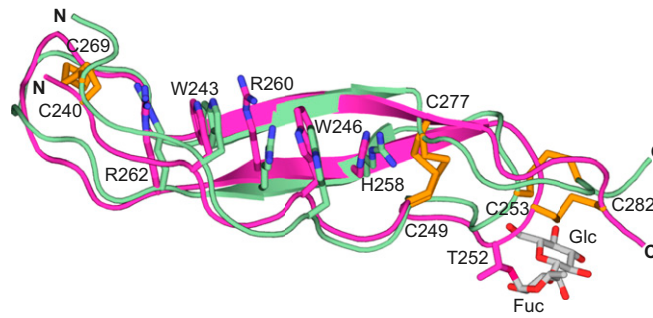

**Fig. 54.** Superposition of TRAP TSR domains from *P. vivax* crystal structure and *P. falciparum* NMR structures. Backbones are magenta for *P. vivax* and green for *P. falciparum* (model 1 of PDB ID 2BBX). The TSR layer residues and the carbohydrate (present only in the crystal structure) are shown as sticks. Residue numbering is for *P. vivax*; His258 is Arg in *P. falciparum*.

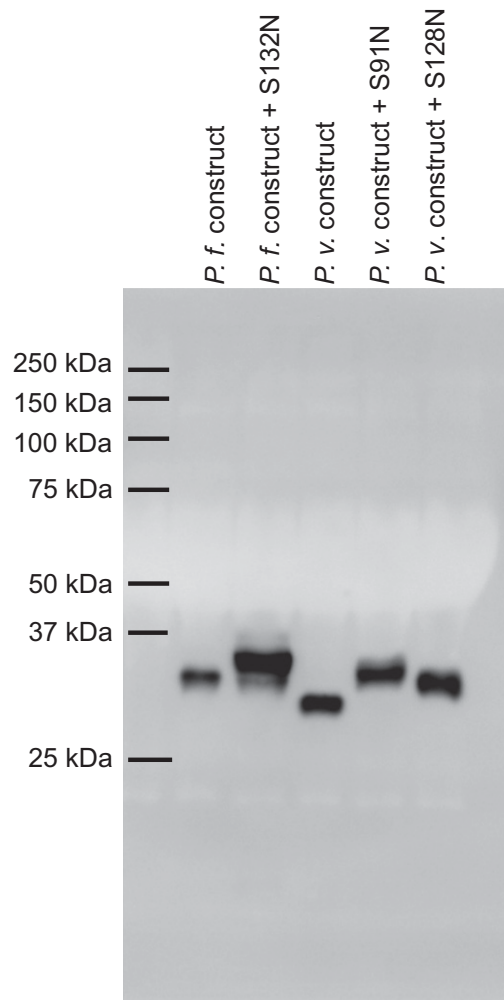

**Fig. 55.** *N*-glycosylation of back-mutated constructs in 293T cells. The crystallization constructs with all potential *N*-linked sites mutated and indicated back-mutations to wild-type sequence are compared. Culture supernatants from transient transfections were subjected to reducing SDS 12.5% PAGE and anti-His Western blotting.

**Table S1. Data collection and refinement statistics**

|                                             | pfTRAP (26-299)      | pfTRAP (41-240)        | pvTRAP                                        | pvTRAP (Mg)                                   | pvTRAP (Mn)                                   |
|---------------------------------------------|----------------------|------------------------|-----------------------------------------------|-----------------------------------------------|-----------------------------------------------|
| <b>Data</b>                                 |                      |                        |                                               |                                               |                                               |
| Space group                                 | I4                   | P42 <sub>1</sub> 2     | P2 <sub>1</sub> 2 <sub>1</sub> 2 <sub>1</sub> | P2 <sub>1</sub> 2 <sub>1</sub> 2 <sub>1</sub> | P2 <sub>1</sub> 2 <sub>1</sub> 2 <sub>1</sub> |
| Cell dimensions                             |                      |                        |                                               |                                               |                                               |
| <i>a</i> , <i>b</i> , <i>c</i> (Å)          | 110.2, 110.2, 47.0   | 117.7, 117.7, 65.5     | 56.3, 100.5, 158.6                            | 59.6, 98.0, 159.2                             | 59.6, 98.6, 159.5                             |
| $\alpha$ , $\beta$ , $\gamma$ (°)           | 90, 90, 90           | 90, 90, 90             | 90, 90, 90                                    | 90, 90, 90                                    | 90, 90, 90                                    |
| Resolution (Å)                              | 43.27–2.2 (2.26–2.2) | 41.03–2.25 (2.29–2.25) | 42.43–2.2 (2.24–2.2)                          | 41.72–2.24 (2.28–2.24)                        | 39.88–2.2 (2.24–2.2)                          |
| $R_{\text{sym}}^*$                          | 0.165 (1.123)        | 0.157 (1.000)          | 0.071 (0.315)                                 | 0.085 (0.353)                                 | 0.132 (0.948)                                 |
| <i>I</i> / $\sigma$ <i>I</i>                | 11.26 (1.69)         | 10.22 (1.28)           | 16.72 (3.69)                                  | 13.73 (4.36)                                  | 10.61 (1.49)                                  |
| Completeness (%)                            | 98.1 (97.5)          | 99.9 (99.6)            | 98.3 (88.0)                                   | 99.6 (99.1)                                   | 99.7 (99.4)                                   |
| Redundancy                                  | 2.89 (2.80)          | 6.8 (5.7)              | 3.8 (3.5)                                     | 4.0 (3.8)                                     | 4.0 (3.8)                                     |
| <b>Refinement</b>                           |                      |                        |                                               |                                               |                                               |
| Resolution (Å)                              | 43.27–2.2            | 41.03–2.25             | 42.43–2.2                                     | 41.72–2.24                                    | 39.88–2.2                                     |
| No. reflections                             | 14,268               | 22,394                 | 46,091                                        | 45,385                                        | 47,461                                        |
| $R_{\text{work}}/R_{\text{free}}^{\dagger}$ | 0.17/0.22            | 0.19/0.24              | 0.16/0.20                                     | 0.16/0.20                                     | 0.17/0.21                                     |
| <b>rms deviations</b>                       |                      |                        |                                               |                                               |                                               |
| Bond lengths (Å)                            | 0.008                | 0.003                  | 0.009                                         | 0.008                                         | 0.007                                         |
| Bond angles (°)                             | 1.10                 | 0.70                   | 0.99                                          | 1.00                                          | 0.99                                          |
| Residue range                               | 41–240               | 41–240                 | 25–283                                        | 28–283                                        | 28–283                                        |
| Ramachandran (%) <sup>‡</sup>               | 98.0/2.0/0           | 96.7/3.3/0             | 96.3/3.7/0                                    | 97.4/2.6/0                                    | 96.1/3.9/0                                    |
| PDB code                                    | 4HQF                 | 4HQK                   | 4HQO                                          | 4HQL                                          | 4HQN                                          |

Values for highest resolution shells are in parentheses.

\* $R_{\text{sym}} = \sum_i |I(i, h) - \langle I(h) \rangle| / \sum_i I(i, h)$  where  $I(i, h)$  and  $\langle I(h) \rangle$  are the *i*th and mean measurement of intensity of reflection *h*.

<sup>†</sup> $R_{\text{free}}$  was calculated using 5% of the data.

<sup>‡</sup>Residues in favored, accepted, and outlier regions of the Ramachandran plot as reported by MOLPROBITY.
